# Supplementary material for: Preclinical Development of Bivalent Chimeric Antigen Receptors Targeting Both CD19 and CD22
Source: PubMed Central journal article supplement — Mol Ther Oncolytics. 2018 Nov 6;11:127–37. doi: 10.1016/j.omto.2018.10.006 (PMC6300726; doi:10.1016/j.omto.2018.10.006), 2018-11-06
Supplement: mmc1.pdf [file mmc1.pdf]

**OMTO, Volume 11**

## **Supplemental Information**

### **Preclinical Development of Bivalent Chimeric**

### **Antigen Receptors Targeting Both CD19 and CD22**

**Haiying Qin, Sneha Ramakrishna, Sang Nguyen, Thomas J. Fountaine, Anusha Ponduri, Maryalice Stetler-Stevenson, Constance M. Yuan, Waleed Haso, Jack F. Shern, Nirali N. Shah, and Terry J. Fry**

## Supplementary Information

A.

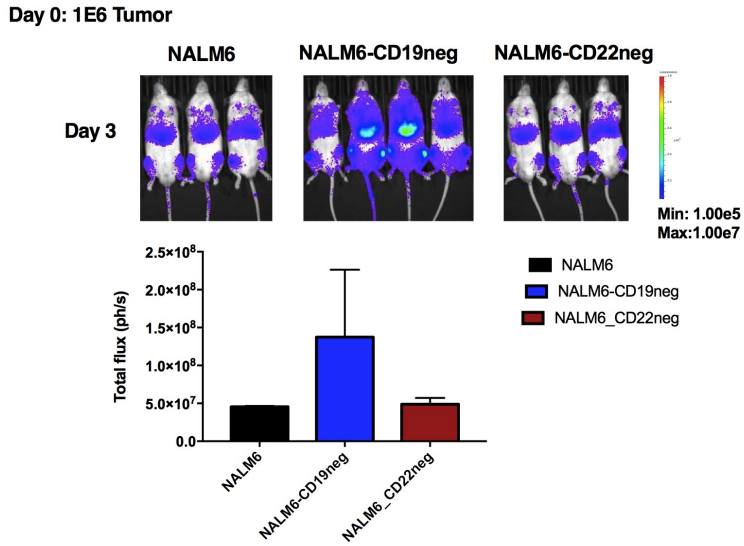

B.

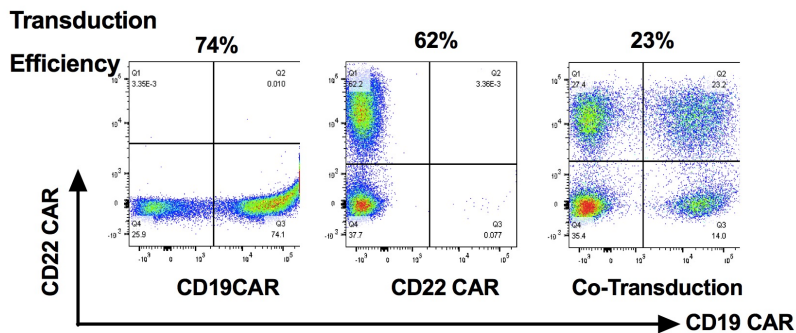

### Supplemental Figure 1: *In vivo* progression of CD19neg and CD22neg Leukemia and Co-Transduction of CD19 and CD22 CAR.

(A) NSG mice were challenged with 1E6 of NALM6, or NALM6-CD19neg, or NALM6-CD22neg leukemia on day 0 and imaged on day 3. (C) Co-transduction with both CD19 and CD22 vectors. The vectors for CD19 and CD22 CAR were produced by transient transfection of the 293T lenti packaging cell line. Human PBMCs from a healthy donor were activated with CD3/CD28 microbeads for 24 hours. Activated T cells were then transduced with the vector individually or co-transduced with both CD19 and CD22 vectors. Surface expression of CD19 CAR and CD22 CAR were analyzed on day 8.

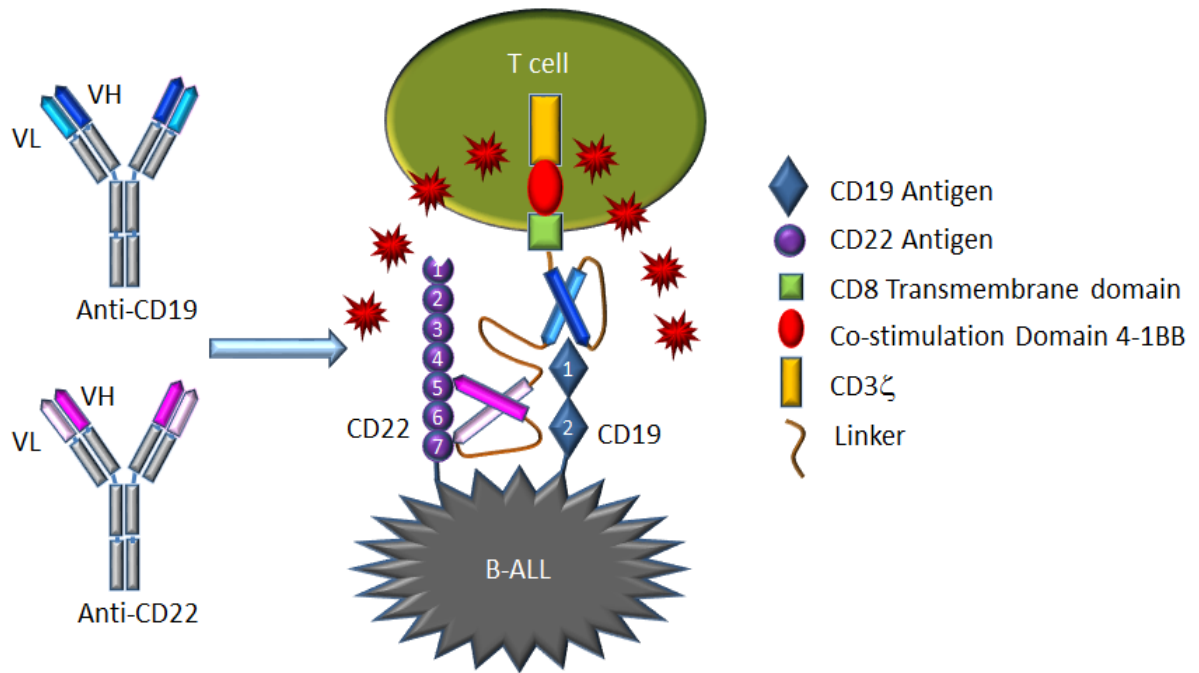

**Supplemental 2: Schematic illustration of the Bispecific CAR Activity**

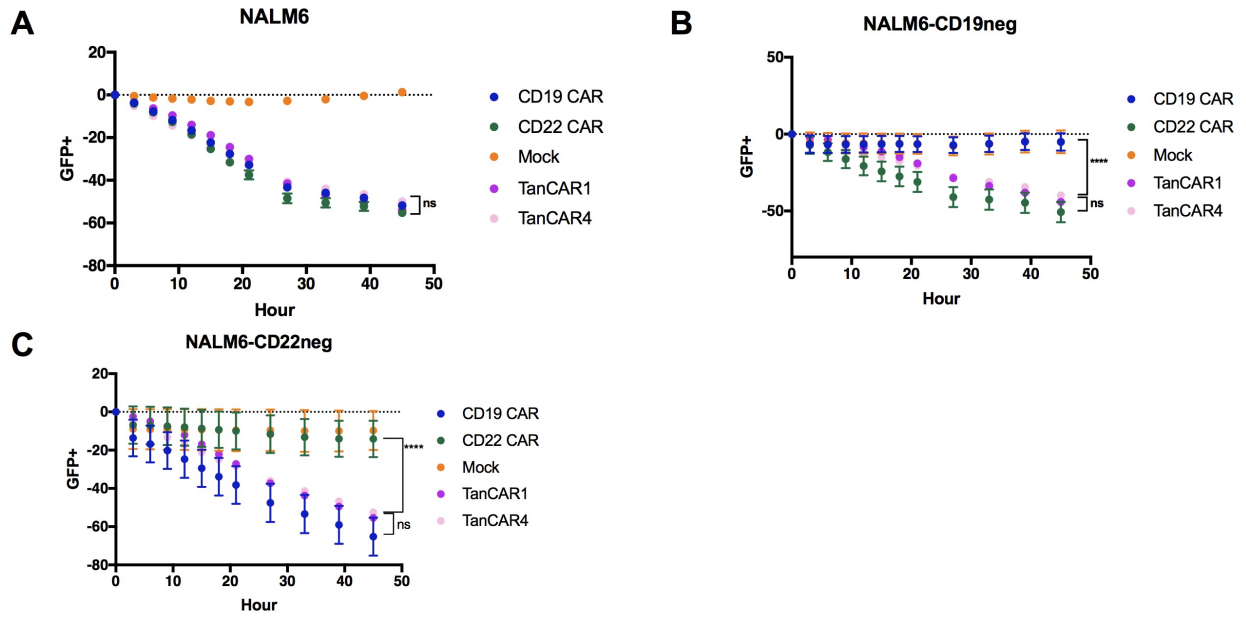

**Supplemental 3:** Killing of GFP+ tumor cells assay upon co-incubation of 5E4 of CD19 and CD22 monovalent CARs, TanCAR1, TanCAR4 T cells with 5E4 of (A) NALM6, (B) NALM6-CD19<sup>neg</sup>, or (C) NALM6-CD22<sup>neg</sup> cells. \*\*\*\*p<0.0001

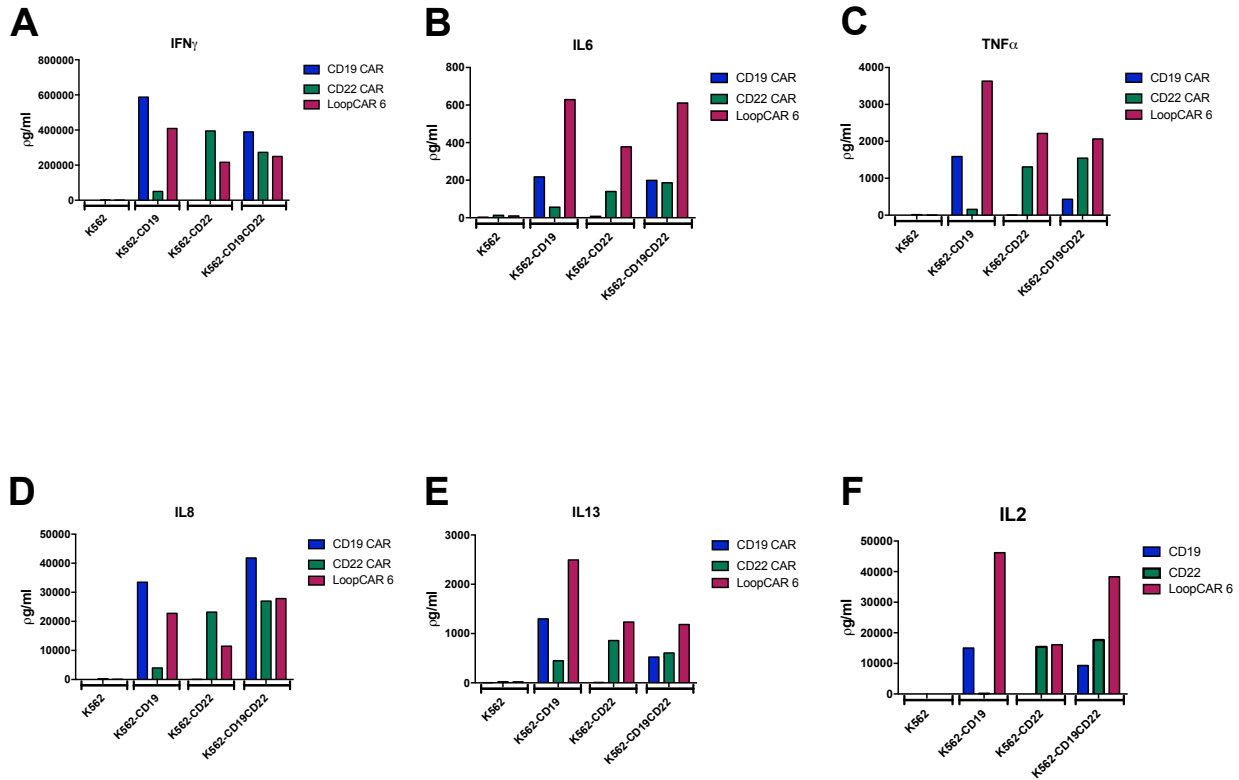

**Supplemental 4: Cytokine Production by Bivalent LoopCAR6 upon stimulation via one or both binding domains.** Equal number (1E5) of loopCAR6 CAR+ cells were co-incubated with CD19 or CD22, or CD19CD22 expression K562. (A) IFN $\gamma$ , (B) IL6, (C) TNF $\alpha$ , (D) IL8, (E) IL13, and (F) IL2 production in the culture supernatant were detected with multiplex assay.

Day 0: 1E6 NALM6  
 Day 3: 1st ADT  
 Day 7: 2nd ADT

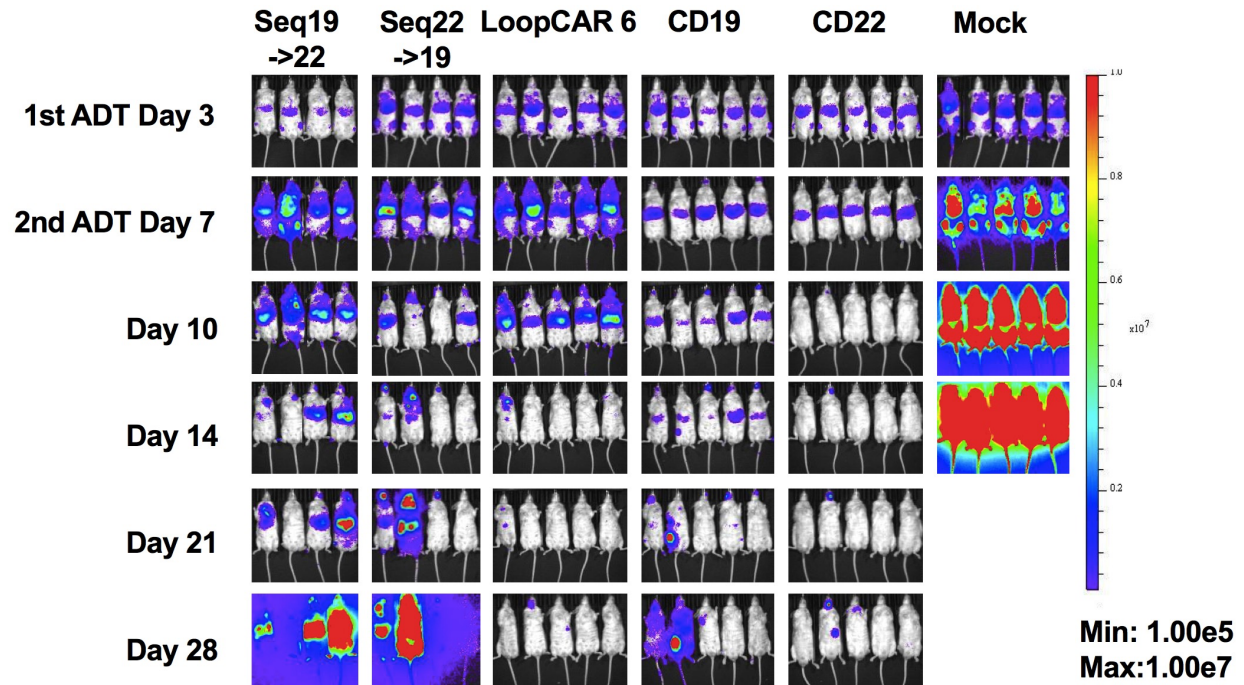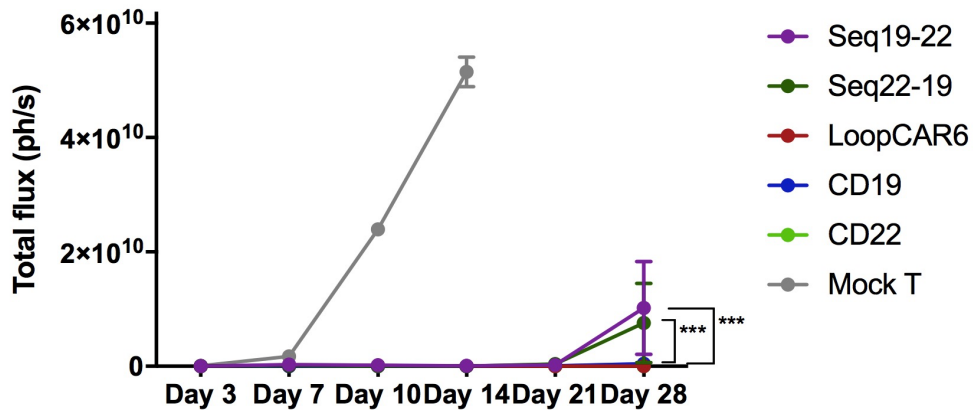

**Supplemental 5: Treatment with LoopCAR6 CAR is superior to sequential admission of monovalent CARs and may reduce the likelihood of leukemic relapse**

NSG mice were challenged with 1E6 of NALM6 leukemia on day 0. On day 3, mice in group 3 to 6 received 3E6 of CAR<sup>+</sup> T cells. Mice in group 1 and group 2 received sequential treatment with 1E6 CD19 or CD22 CAR<sup>+</sup> T cells on day 3 and followed by 3E6 CAR<sup>+</sup> T cells on day 7.

Quantification of luminescence is shown below. \*\*\*p<0.001.

**A**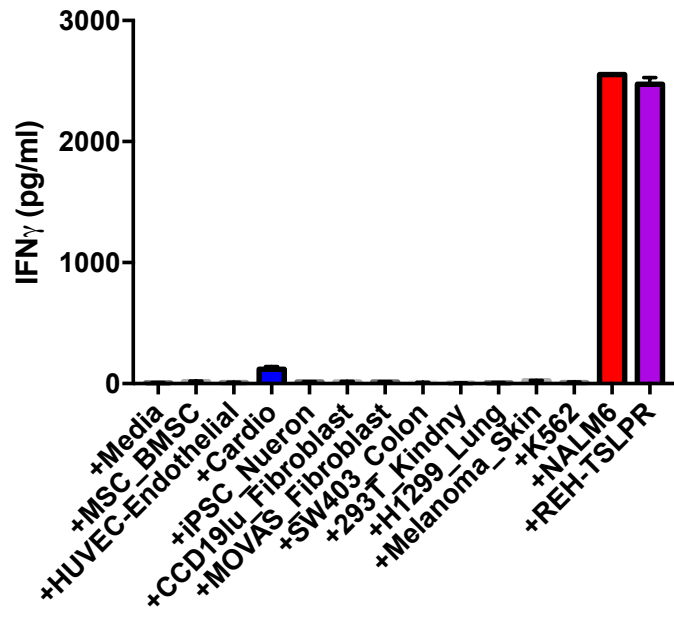**B**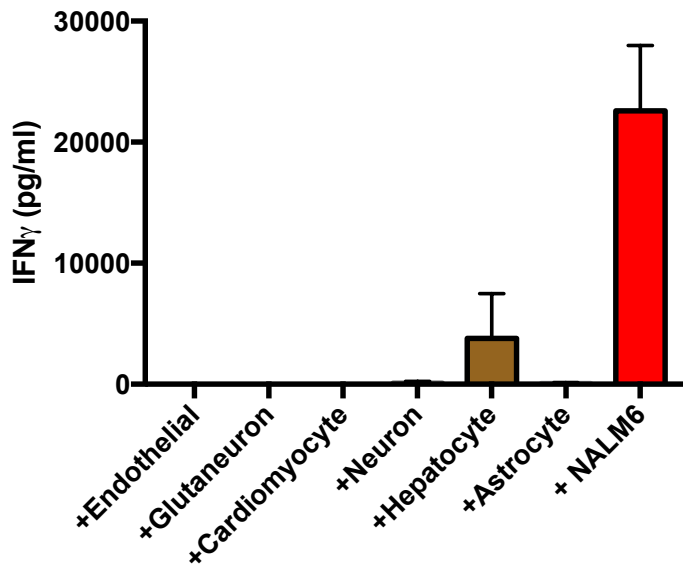

**Supplemental 6: LoopCAR6 demonstrates no or minimal reactivity against iPS-derived cell lines.** 1E5 of LoopCAR6 CAR<sup>+</sup> T cell were co-incubated with equal number of iPS-derived cells. IFN $\gamma$  in the culture supernatant was measured by ELISA at 24 hours.

| Construct Name | Structure                                                 | Surface Expression                  | In Vitro Efficacy   | In Vivo Efficacy |
|----------------|-----------------------------------------------------------|-------------------------------------|---------------------|------------------|
| TanCAR1        | CD22VH-Linker1-CD22VL-Linker5-CD19VL-Linker6-CD19VH-BBZ   | 60% of both anti-CD19 and anti-CD22 | CD19 ++<br>CD22     | ++               |
| TanCAR2        | CD19VL-Linker6-CD19VH-Linker5-CD22VH-Linker1-CD22VL-BBZ   | 29% anti-CD19 and anti-CD22         | CD19 +              | +                |
| TanCAR3        | CD22VH-Linker6-CD22VL-Linker5-CD19VL-Linker6-CD19VH-BBZ   | None                                |                     |                  |
| TanCAR4        | CD22VH-Linker1-CD22VL-Linker4-CD19VL-Linker6-CD19VH-BBZ   | 56% of both anti-CD19 and anti-CD22 | CD19 ++<br>CD22 ++  | +++              |
| LoopCAR1       | CD19VL-Linker3-CD22VH-Linker1-CD22VL-Linker3-CD19VH-BBZ   | 19% of both anti-CD19 and anti-CD22 | CD19 +<br>CD22      |                  |
| LoopCAR2       | CD19VL-Linker3A-CD22VH-Linker6-CD22VL-Linker3B-CD19VH-BBZ | 42% of both anti-CD19 and anti-CD22 | CD19 ++<br>CD22     |                  |
| LoopCAR3       | CD19VL-Linker2-CD22VH-Linker6-CD22VL-Linker2-CD19VH-BBZ   | 24% of both anti-CD19 and anti-CD22 | CD19 ++<br>CD22 ++  |                  |
| LoopCAR4       | CD22VH-Linker2-CD19VL-Linker2-CD19VH-Linker2-CD22VL-BBZ   | 63% of both anti-CD19 and anti-CD22 | CD19 ++<br>CD22 +++ | +++              |
| LoopCAR5       | CD19VL-Linker3C-CD22VH-Linker2-CD22VL-Linker3D-CD19VH-BBZ | 49% of both anti-CD19 and anti-CD22 | CD19 +<br>CD22      |                  |
| LoopCAR6       | CD19VL-Linker1-CD22VH-Linker6-CD22VL-Linker1-CD19VH-BBZ   | 82% of both anti-CD19 and anti-CD22 | CD19 +++<br>CD22 ++ | ++++             |

Linker annotation: Linker 1: GGGGS  
Linker 2: GGGSGGGGS  
Linker 3: GGGSGGGSGGGGS  
Linker 3A: GGCGSGGGSGGGGS  
Linker 3B: GGGSGGGSGGGGS  
Linker 3C: GGGSGGGSGGGGS  
Linker 3D: GGGCGGGSGGGGS  
Linker 4: GGGSGGGSGGGSGGGGS  
Linker 5: GGGSGGGSGGGSGGGSGGGGS  
Linker 6: GSTSGSGKPGSGEGSTKG

**Supplemental Table 1: Summary of CD19/CD22 Bivalent CAR Structures and Activity.**
